# Supplementary material
Source: publisher figshare collection journal article supplement (https://acs.figshare.com/ndownloader/files/5882370)
Supplement: Supplementary file 1 [file 5882370]

# om020568b.cif
 
data_2b'
 
_audit_creation_method            SHELXL-97
_chemical_name_systematic
;
 dichloro-(1-benzyl-2-(2-pyridyl)-4,5-diphenyl-imidazoline,N,N')
 -palladium(II) chloroform solvate
;
_chemical_name_common             ?
_chemical_melting_point           ?
_chemical_formula_moiety          
 '(C27 H23 Cl2 N3 Pd) (C H Cl3)'
_chemical_formula_sum
 'C28 H24 Cl5 N3 Pd'
_chemical_formula_weight          686.15
 
loop_
 _atom_type_symbol
 _atom_type_description
 _atom_type_scat_dispersion_real
 _atom_type_scat_dispersion_imag
 _atom_type_scat_source
 'C'  'C'   0.0033   0.0016
 'International Tables Vol C Tables 4.2.6.8 and 6.1.1.4'
 'H'  'H'   0.0000   0.0000
 'International Tables Vol C Tables 4.2.6.8 and 6.1.1.4'
 'N'  'N'   0.0061   0.0033
 'International Tables Vol C Tables 4.2.6.8 and 6.1.1.4'
 'Pd'  'Pd'  -0.9988   1.0072
 'International Tables Vol C Tables 4.2.6.8 and 6.1.1.4'
 'Cl'  'Cl'   0.1484   0.1585
 'International Tables Vol C Tables 4.2.6.8 and 6.1.1.4'
 
_symmetry_cell_setting            'monoclinic'
_symmetry_space_group_name_H-M    'P21/c'
 
loop_
 _symmetry_equiv_pos_as_xyz
 'x, y, z'
 '-x, y+1/2, -z+1/2'
 '-x, -y, -z'
 'x, -y-1/2, z-1/2'
 
_cell_length_a                    13.186(3)
_cell_length_b                    12.405(3)
_cell_length_c                    17.813(5)
_cell_angle_alpha                 90.00
_cell_angle_beta                  105.01(2)
_cell_angle_gamma                 90.00
_cell_volume                      2814.3(12)
_cell_formula_units_Z             4
_cell_measurement_temperature     150(2)
_cell_measurement_reflns_used     ?
_cell_measurement_theta_min       ?
_cell_measurement_theta_max       ?
 
_exptl_crystal_description        ?
_exptl_crystal_colour             ?
_exptl_crystal_size_max           ?
_exptl_crystal_size_mid           ?
_exptl_crystal_size_min           ?
_exptl_crystal_density_meas       ?
_exptl_crystal_density_diffrn     1.619
_exptl_crystal_density_method     'not measured'
_exptl_crystal_F_000              1376
_exptl_absorpt_coefficient_mu     1.158
_exptl_absorpt_correction_type       refdelf
_exptl_absorpt_correction_T_min      0.4672
_exptl_absorpt_correction_T_max      0.9528
_exptl_absorpt_process_details    
;
Parkin S,Moezzi B & Hope H, (1995) J. Appl. Cryst. 28, 53-56
Cubic fit to sin(theta)/lambda - 24 parameters
;
_exptl_special_details
;
 ?
;
 
_diffrn_ambient_temperature       150(2)
_diffrn_radiation_wavelength      0.71073
_diffrn_radiation_type            mok\a
_diffrn_radiation_source          'fine-focus sealed tube'
_diffrn_radiation_monochromator   graphite
_diffrn_measurement_device_type   'image plate dip1030'
_diffrn_measurement_method        'laser scanner'
_diffrn_detector_area_resol_mean  ?
_diffrn_standards_number          ?
_diffrn_standards_interval_count  ?
_diffrn_standards_interval_time   ?
_diffrn_standards_decay_%         ?
_diffrn_reflns_number             13441
_diffrn_reflns_av_R_equivalents   0.0565
_diffrn_reflns_av_sigmaI/netI     0.0751
_diffrn_reflns_limit_h_min        -16
_diffrn_reflns_limit_h_max        17
_diffrn_reflns_limit_k_min        -16
_diffrn_reflns_limit_k_max        16
_diffrn_reflns_limit_l_min        -23
_diffrn_reflns_limit_l_max        23
_diffrn_reflns_theta_min          2.38
_diffrn_reflns_theta_max          28.62
_reflns_number_total              6978
_reflns_number_gt                 4790
_reflns_threshold_expression      >2sigma(I)
 
_computing_data_collection        'Nonius xpress'
_computing_cell_refinement        'Mosflm (J. Appl. Cryst., 1993, 21, 67)'
_computing_data_reduction         'Mosflm (J. Appl. Cryst., 1993, 21, 67)'
_computing_structure_solution     'Shelxs-97 (Sheldrick, 1990)'
_computing_structure_refinement   'Shelxl-97 (Sheldrick, 1997)'
_computing_molecular_graphics     'Ortep3/windows (Farrugia,1997)'
_computing_publication_material   'Wingx 1.64.03 (Farrugia, 1999)'
 
_refine_special_details
;
 Refinement of F^2^ against ALL reflections.  The weighted R-factor wR and
 goodness of fit S are based on F^2^, conventional R-factors R are based
 on F, with F set to zero for negative F^2^. The threshold expression of
 F^2^ > 2sigma(F^2^) is used only for calculating R-factors(gt) etc. and is
 not relevant to the choice of reflections for refinement.  R-factors based
 on F^2^ are statistically about twice as large as those based on F, and R-
 factors based on ALL data will be even larger.
 
 NOTE: The compound is indicated as a dichloro derivative, since the 
 expected methyl was (partially) substituted by a chloro ligand and the
 site was refined as a mixed Cl/C species refined to 0.53/0.47 occupancy
 ratio.
;
 
_refine_ls_structure_factor_coef  Fsqd
_refine_ls_matrix_type            full
_refine_ls_weighting_scheme       calc
_refine_ls_weighting_details
 'calc w=1/[\s^2^(Fo^2^)+(0.0436P)^2^+1.4448P] where P=(Fo^2^+2Fc^2^)/3'
_atom_sites_solution_primary      direct
_atom_sites_solution_secondary    difmap
_atom_sites_solution_hydrogens    geom
_refine_ls_hydrogen_treatment     mixed
_refine_ls_extinction_method      none
_refine_ls_extinction_coef        ?
_refine_ls_number_reflns          6978
_refine_ls_number_parameters      335
_refine_ls_number_restraints      0
_refine_ls_R_factor_all           0.0630
_refine_ls_R_factor_gt            0.0424
_refine_ls_wR_factor_ref          0.1134
_refine_ls_wR_factor_gt           0.1035
_refine_ls_goodness_of_fit_ref    1.034
_refine_ls_restrained_S_all       1.034
_refine_ls_shift/su_max           0.001
_refine_ls_shift/su_mean          0.000
 
loop_
 _atom_site_label
 _atom_site_type_symbol
 _atom_site_fract_x
 _atom_site_fract_y
 _atom_site_fract_z
 _atom_site_U_iso_or_equiv
 _atom_site_adp_type
 _atom_site_occupancy
 _atom_site_symmetry_multiplicity
 _atom_site_calc_flag
 _atom_site_refinement_flags
 _atom_site_disorder_assembly
 _atom_site_disorder_group
Pd Pd 0.44812(2) 0.47575(2) 0.856342(17) 0.03512(11) Uani 1 1 d . . .
Cl1 Cl 0.31523(9) 0.35068(10) 0.82001(7) 0.0586(3) Uani 1 1 d . . .
Cl2 Cl 0.53648(12) 0.36711(13) 0.94711(10) 0.0470(6) Uani 0.525(6) 1 d P . .
C2X C 0.53648(12) 0.36711(13) 0.94711(10) 0.0470(6) Uani 0.475(6) 1 d P . .
N1 N 0.3793(2) 0.5937(3) 0.77555(18) 0.0350(7) Uani 1 1 d . . .
N2 N 0.5530(2) 0.5952(3) 0.88434(17) 0.0340(7) Uani 1 1 d . . .
N3 N 0.5924(2) 0.7706(3) 0.87768(18) 0.0356(7) Uani 1 1 d . . .
C2 C 0.2939(3) 0.5814(3) 0.7165(2) 0.0378(8) Uani 1 1 d . . .
H2 H 0.2557 0.5157 0.7122 0.045 Uiso 1 1 calc R . .
C3 C 0.2590(3) 0.6612(4) 0.6610(2) 0.0434(9) Uani 1 1 d . . .
H3 H 0.1981 0.6502 0.6196 0.052 Uiso 1 1 calc R . .
C4 C 0.3142(3) 0.7568(3) 0.6671(2) 0.0441(9) Uani 1 1 d . . .
H4 H 0.2924 0.8119 0.6294 0.053 Uiso 1 1 calc R . .
C5 C 0.4018(3) 0.7712(3) 0.7289(2) 0.0399(9) Uani 1 1 d . . .
H5 H 0.4402 0.8368 0.7345 0.048 Uiso 1 1 calc R . .
C6 C 0.4327(3) 0.6889(3) 0.7824(2) 0.0329(8) Uani 1 1 d . . .
C7 C 0.5269(3) 0.6872(3) 0.8495(2) 0.0332(8) Uani 1 1 d . . .
C8 C 0.6684(3) 0.7318(3) 0.9495(2) 0.0352(8) Uani 1 1 d . . .
H8 H 0.6440 0.7574 0.9951 0.042 Uiso 1 1 calc R . .
C9 C 0.6543(3) 0.6066(3) 0.9438(2) 0.0360(8) Uani 1 1 d . . .
H9 H 0.6468 0.5781 0.9945 0.043 Uiso 1 1 calc R . .
C10 C 0.7397(3) 0.5446(3) 0.9200(2) 0.0362(8) Uani 1 1 d . . .
C11 C 0.8116(3) 0.4851(4) 0.9751(3) 0.0454(10) Uani 1 1 d . . .
H11 H 0.8064 0.4835 1.0273 0.055 Uiso 1 1 calc R . .
C12 C 0.8908(3) 0.4283(4) 0.9549(3) 0.0515(11) Uani 1 1 d . . .
H12 H 0.9400 0.3883 0.9932 0.062 Uiso 1 1 calc R . .
C13 C 0.8983(3) 0.4296(4) 0.8789(3) 0.0517(11) Uani 1 1 d . . .
H13 H 0.9525 0.3902 0.8650 0.062 Uiso 1 1 calc R . .
C14 C 0.8279(3) 0.4875(4) 0.8237(3) 0.0509(11) Uani 1 1 d . . .
H14 H 0.8336 0.4886 0.7716 0.061 Uiso 1 1 calc R . .
C15 C 0.7477(3) 0.5450(3) 0.8438(2) 0.0423(9) Uani 1 1 d . . .
H15 H 0.6985 0.5845 0.8053 0.051 Uiso 1 1 calc R . .
C16 C 0.7786(3) 0.7739(3) 0.9582(2) 0.0364(8) Uani 1 1 d . . .
C17 C 0.8123(3) 0.8131(3) 0.8956(2) 0.0440(9) Uani 1 1 d . . .
H17 H 0.7663 0.8114 0.8449 0.053 Uiso 1 1 calc R . .
C18 C 0.9128(3) 0.8547(4) 0.9070(3) 0.0491(10) Uani 1 1 d . . .
H18 H 0.9352 0.8819 0.8641 0.059 Uiso 1 1 calc R . .
C19 C 0.9804(3) 0.8568(4) 0.9804(3) 0.0510(11) Uani 1 1 d . . .
H19 H 1.0486 0.8868 0.9879 0.061 Uiso 1 1 calc R . .
C20 C 0.9498(3) 0.8158(4) 1.0428(3) 0.0467(10) Uani 1 1 d . . .
H20 H 0.9971 0.8159 1.0931 0.056 Uiso 1 1 calc R . .
C21 C 0.8487(3) 0.7741(3) 1.0316(2) 0.0416(9) Uani 1 1 d . . .
H21 H 0.8274 0.7455 1.0746 0.050 Uiso 1 1 calc R . .
C22 C 0.5697(3) 0.8859(3) 0.8688(2) 0.0383(9) Uani 1 1 d . . .
H22A H 0.5640 0.9060 0.8140 0.046 Uiso 1 1 calc R . .
H22B H 0.6300 0.9258 0.9016 0.046 Uiso 1 1 calc R . .
C23 C 0.4703(3) 0.9228(3) 0.8897(2) 0.0371(8) Uani 1 1 d . . .
C24 C 0.4281(3) 1.0223(4) 0.8638(2) 0.0472(10) Uani 1 1 d . . .
H24 H 0.4609 1.0658 0.8329 0.057 Uiso 1 1 calc R . .
C25 C 0.3383(4) 1.0593(4) 0.8824(3) 0.0556(12) Uani 1 1 d . . .
H25 H 0.3102 1.1278 0.8644 0.067 Uiso 1 1 calc R . .
C26 C 0.2896(4) 0.9965(4) 0.9271(3) 0.0540(12) Uani 1 1 d . . .
H26 H 0.2271 1.0208 0.9388 0.065 Uiso 1 1 calc R . .
C27 C 0.3330(3) 0.8981(4) 0.9546(3) 0.0513(11) Uani 1 1 d . . .
H27 H 0.3015 0.8553 0.9866 0.062 Uiso 1 1 calc R . .
C28 C 0.4229(3) 0.8620(3) 0.9353(2) 0.0451(10) Uani 1 1 d . . .
H28 H 0.4520 0.7941 0.9541 0.054 Uiso 1 1 calc R . .
C1 C 1.0342(4) 0.6609(4) 0.8100(3) 0.0609(13) Uani 1 1 d . . .
H1 H 1.0070 0.6467 0.8566 0.073 Uiso 1 1 calc R . .
Cl10 Cl 1.14074(11) 0.74860(15) 0.83882(11) 0.0897(5) Uani 1 1 d . . .
Cl20 Cl 1.07536(15) 0.53812(14) 0.78077(14) 0.1102(7) Uani 1 1 d . . .
Cl30 Cl 0.93198(11) 0.71976(14) 0.73873(8) 0.0803(4) Uani 1 1 d . . .
 
loop_
 _atom_site_aniso_label
 _atom_site_aniso_U_11
 _atom_site_aniso_U_22
 _atom_site_aniso_U_33
 _atom_site_aniso_U_23
 _atom_site_aniso_U_13
 _atom_site_aniso_U_12
Pd 0.03857(18) 0.03219(17) 0.03471(16) 0.00156(13) 0.00967(11) -0.00183(12)
Cl1 0.0603(7) 0.0510(7) 0.0571(7) 0.0050(5) 0.0018(5) -0.0198(5)
Cl2 0.0518(10) 0.0411(10) 0.0504(11) 0.0099(7) 0.0174(7) 0.0061(7)
C2X 0.0518(10) 0.0411(10) 0.0504(11) 0.0099(7) 0.0174(7) 0.0061(7)
N1 0.0341(16) 0.0368(19) 0.0362(17) -0.0001(14) 0.0128(13) 0.0006(13)
N2 0.0351(16) 0.0356(18) 0.0299(16) 0.0013(13) 0.0063(12) 0.0021(13)
N3 0.0345(16) 0.0314(17) 0.0369(17) 0.0018(14) 0.0020(12) 0.0013(13)
C2 0.0310(18) 0.039(2) 0.042(2) -0.0042(17) 0.0075(15) -0.0028(16)
C3 0.039(2) 0.050(3) 0.037(2) 0.0001(18) 0.0036(16) 0.0017(18)
C4 0.042(2) 0.045(3) 0.043(2) 0.0060(19) 0.0075(17) 0.0081(18)
C5 0.041(2) 0.037(2) 0.040(2) 0.0051(17) 0.0072(16) 0.0018(16)
C6 0.0316(18) 0.034(2) 0.0328(19) -0.0004(15) 0.0080(14) 0.0009(14)
C7 0.0365(19) 0.032(2) 0.0332(19) 0.0005(15) 0.0124(15) 0.0013(15)
C8 0.0362(19) 0.034(2) 0.0348(19) -0.0004(16) 0.0083(15) 0.0010(15)
C9 0.0377(19) 0.035(2) 0.0309(19) 0.0021(15) 0.0009(15) 0.0033(15)
C10 0.0345(19) 0.031(2) 0.042(2) -0.0010(16) 0.0076(15) -0.0029(15)
C11 0.046(2) 0.044(2) 0.041(2) -0.0010(19) 0.0013(17) 0.0041(18)
C12 0.043(2) 0.043(3) 0.059(3) -0.006(2) -0.0028(19) 0.0100(19)
C13 0.037(2) 0.039(2) 0.080(3) -0.007(2) 0.018(2) 0.0019(18)
C14 0.056(3) 0.046(3) 0.058(3) -0.002(2) 0.028(2) 0.002(2)
C15 0.046(2) 0.039(2) 0.043(2) 0.0045(18) 0.0140(17) 0.0037(17)
C16 0.0335(18) 0.029(2) 0.047(2) -0.0040(17) 0.0106(15) 0.0020(15)
C17 0.047(2) 0.043(2) 0.040(2) 0.0001(18) 0.0067(17) 0.0033(18)
C18 0.047(2) 0.049(3) 0.053(3) 0.003(2) 0.0169(19) 0.0002(19)
C19 0.039(2) 0.042(3) 0.068(3) -0.001(2) 0.007(2) -0.0033(18)
C20 0.036(2) 0.049(3) 0.049(2) -0.002(2) 0.0000(17) 0.0011(17)
C21 0.041(2) 0.041(2) 0.039(2) -0.0028(18) 0.0046(16) 0.0053(17)
C22 0.039(2) 0.027(2) 0.045(2) 0.0036(16) 0.0056(16) -0.0007(15)
C23 0.040(2) 0.032(2) 0.035(2) -0.0028(16) 0.0027(15) 0.0015(16)
C24 0.058(3) 0.034(2) 0.047(2) 0.0027(19) 0.0087(19) 0.0040(19)
C25 0.065(3) 0.039(3) 0.059(3) 0.000(2) 0.009(2) 0.017(2)
C26 0.048(2) 0.055(3) 0.059(3) -0.011(2) 0.014(2) 0.007(2)
C27 0.059(3) 0.046(3) 0.053(3) 0.004(2) 0.022(2) 0.006(2)
C28 0.051(2) 0.038(2) 0.047(2) 0.0069(19) 0.0149(18) 0.0076(18)
C1 0.057(3) 0.073(4) 0.059(3) 0.002(3) 0.027(2) -0.002(2)
Cl10 0.0648(9) 0.1041(13) 0.1017(12) -0.0187(10) 0.0246(8) -0.0165(8)
Cl20 0.1144(14) 0.0754(12) 0.178(2) -0.0127(12) 0.1048(14) -0.0063(9)
Cl30 0.0844(9) 0.1027(12) 0.0481(7) 0.0081(7) 0.0068(6) -0.0070(8)
 
_geom_special_details
;
 All esds (except the esd in the dihedral angle between two l.s. planes)
 are estimated using the full covariance matrix.  The cell esds are taken
 into account individually in the estimation of esds in distances, angles
 and torsion angles; correlations between esds in cell parameters are only
 used when they are defined by crystal symmetry.  An approximate (isotropic)
 treatment of cell esds is used for estimating esds involving l.s. planes.
;
 
loop_
 _geom_bond_atom_site_label_1
 _geom_bond_atom_site_label_2
 _geom_bond_distance
 _geom_bond_site_symmetry_2
 _geom_bond_publ_flag
Pd N2 2.000(3) . ?
Pd N1 2.088(3) . ?
Pd Cl2 2.1937(17) . ?
Pd Cl1 2.3041(12) . ?
N1 C2 1.336(5) . ?
N1 C6 1.364(5) . ?
N2 C7 1.303(5) . ?
N2 C9 1.481(4) . ?
N3 C7 1.358(5) . ?
N3 C22 1.461(5) . ?
N3 C8 1.486(5) . ?
C2 C3 1.390(6) . ?
C3 C4 1.380(6) . ?
C4 C5 1.385(5) . ?
C5 C6 1.384(5) . ?
C6 C7 1.484(5) . ?
C8 C16 1.514(5) . ?
C8 C9 1.565(5) . ?
C9 C10 1.512(5) . ?
C10 C11 1.387(5) . ?
C10 C15 1.388(6) . ?
C11 C12 1.383(6) . ?
C12 C13 1.383(7) . ?
C13 C14 1.368(6) . ?
C14 C15 1.397(6) . ?
C16 C17 1.390(6) . ?
C16 C21 1.392(5) . ?
C17 C18 1.388(6) . ?
C18 C19 1.379(6) . ?
C19 C20 1.374(6) . ?
C20 C21 1.395(6) . ?
C22 C23 1.523(5) . ?
C23 C28 1.372(6) . ?
C23 C24 1.384(6) . ?
C24 C25 1.387(6) . ?
C25 C26 1.385(7) . ?
C26 C27 1.383(6) . ?
C27 C28 1.391(6) . ?
C1 Cl20 1.741(6) . ?
C1 Cl10 1.745(5) . ?
C1 Cl30 1.754(5) . ?
 
loop_
 _geom_angle_atom_site_label_1
 _geom_angle_atom_site_label_2
 _geom_angle_atom_site_label_3
 _geom_angle
 _geom_angle_site_symmetry_1
 _geom_angle_site_symmetry_3
 _geom_angle_publ_flag
N2 Pd N1 78.56(12) . . ?
N2 Pd Cl2 94.03(10) . . ?
N1 Pd Cl2 172.59(10) . . ?
N2 Pd Cl1 174.51(9) . . ?
N1 Pd Cl1 96.62(9) . . ?
Cl2 Pd Cl1 90.77(6) . . ?
C2 N1 C6 118.7(3) . . ?
C2 N1 Pd 126.1(3) . . ?
C6 N1 Pd 115.0(2) . . ?
C7 N2 C9 109.6(3) . . ?
C7 N2 Pd 116.8(2) . . ?
C9 N2 Pd 133.4(2) . . ?
C7 N3 C22 127.8(3) . . ?
C7 N3 C8 107.1(3) . . ?
C22 N3 C8 119.0(3) . . ?
N1 C2 C3 122.3(4) . . ?
C4 C3 C2 119.0(4) . . ?
C3 C4 C5 119.2(4) . . ?
C6 C5 C4 119.2(4) . . ?
N1 C6 C5 121.6(3) . . ?
N1 C6 C7 111.4(3) . . ?
C5 C6 C7 126.9(3) . . ?
N2 C7 N3 115.3(3) . . ?
N2 C7 C6 117.3(3) . . ?
N3 C7 C6 127.3(3) . . ?
N3 C8 C16 113.1(3) . . ?
N3 C8 C9 102.9(3) . . ?
C16 C8 C9 116.4(3) . . ?
N2 C9 C10 110.6(3) . . ?
N2 C9 C8 102.2(3) . . ?
C10 C9 C8 116.0(3) . . ?
C11 C10 C15 118.9(4) . . ?
C11 C10 C9 119.6(4) . . ?
C15 C10 C9 121.5(3) . . ?
C12 C11 C10 120.7(4) . . ?
C13 C12 C11 120.0(4) . . ?
C14 C13 C12 120.2(4) . . ?
C13 C14 C15 120.1(4) . . ?
C10 C15 C14 120.2(4) . . ?
C17 C16 C21 118.7(4) . . ?
C17 C16 C8 122.4(4) . . ?
C21 C16 C8 118.9(4) . . ?
C18 C17 C16 120.3(4) . . ?
C19 C18 C17 120.3(4) . . ?
C20 C19 C18 120.4(4) . . ?
C19 C20 C21 119.5(4) . . ?
C16 C21 C20 120.8(4) . . ?
N3 C22 C23 115.6(3) . . ?
C28 C23 C24 118.9(4) . . ?
C28 C23 C22 122.2(4) . . ?
C24 C23 C22 118.9(4) . . ?
C23 C24 C25 120.6(4) . . ?
C26 C25 C24 120.2(4) . . ?
C27 C26 C25 119.3(4) . . ?
C26 C27 C28 119.8(4) . . ?
C23 C28 C27 121.2(4) . . ?
Cl20 C1 Cl10 110.1(3) . . ?
Cl20 C1 Cl30 112.8(3) . . ?
Cl10 C1 Cl30 111.2(3) . . ?
 
loop_
 _geom_torsion_atom_site_label_1
 _geom_torsion_atom_site_label_2
 _geom_torsion_atom_site_label_3
 _geom_torsion_atom_site_label_4
 _geom_torsion
 _geom_torsion_site_symmetry_1
 _geom_torsion_site_symmetry_2
 _geom_torsion_site_symmetry_3
 _geom_torsion_site_symmetry_4
 _geom_torsion_publ_flag
N2 Pd N1 C2 173.0(3) . . . . ?
Cl2 Pd N1 C2 174.8(6) . . . . ?
Cl1 Pd N1 C2 -9.7(3) . . . . ?
N2 Pd N1 C6 -2.3(2) . . . . ?
Cl2 Pd N1 C6 -0.5(9) . . . . ?
Cl1 Pd N1 C6 175.0(2) . . . . ?
N1 Pd N2 C7 7.5(3) . . . . ?
Cl2 Pd N2 C7 -172.2(3) . . . . ?
Cl1 Pd N2 C7 -21.2(12) . . . . ?
N1 Pd N2 C9 -179.5(3) . . . . ?
Cl2 Pd N2 C9 0.8(3) . . . . ?
Cl1 Pd N2 C9 151.8(8) . . . . ?
C6 N1 C2 C3 1.3(5) . . . . ?
Pd N1 C2 C3 -173.8(3) . . . . ?
N1 C2 C3 C4 -0.1(6) . . . . ?
C2 C3 C4 C5 -1.0(6) . . . . ?
C3 C4 C5 C6 0.9(6) . . . . ?
C2 N1 C6 C5 -1.4(5) . . . . ?
Pd N1 C6 C5 174.3(3) . . . . ?
C2 N1 C6 C7 -178.1(3) . . . . ?
Pd N1 C6 C7 -2.5(4) . . . . ?
C4 C5 C6 N1 0.3(6) . . . . ?
C4 C5 C6 C7 176.5(4) . . . . ?
C9 N2 C7 N3 -3.8(4) . . . . ?
Pd N2 C7 N3 170.8(2) . . . . ?
C9 N2 C7 C6 174.0(3) . . . . ?
Pd N2 C7 C6 -11.4(4) . . . . ?
C22 N3 C7 N2 -159.4(4) . . . . ?
C8 N3 C7 N2 -7.9(4) . . . . ?
C22 N3 C7 C6 23.0(6) . . . . ?
C8 N3 C7 C6 174.6(3) . . . . ?
N1 C6 C7 N2 9.0(4) . . . . ?
C5 C6 C7 N2 -167.5(4) . . . . ?
N1 C6 C7 N3 -173.5(3) . . . . ?
C5 C6 C7 N3 10.0(6) . . . . ?
C7 N3 C8 C16 141.4(3) . . . . ?
C22 N3 C8 C16 -64.1(4) . . . . ?
C7 N3 C8 C9 15.1(4) . . . . ?
C22 N3 C8 C9 169.6(3) . . . . ?
C7 N2 C9 C10 -111.1(4) . . . . ?
Pd N2 C9 C10 75.5(4) . . . . ?
C7 N2 C9 C8 13.0(4) . . . . ?
Pd N2 C9 C8 -160.4(3) . . . . ?
N3 C8 C9 N2 -16.4(3) . . . . ?
C16 C8 C9 N2 -140.6(3) . . . . ?
N3 C8 C9 C10 103.9(3) . . . . ?
C16 C8 C9 C10 -20.3(5) . . . . ?
N2 C9 C10 C11 -138.1(4) . . . . ?
C8 C9 C10 C11 106.1(4) . . . . ?
N2 C9 C10 C15 41.4(5) . . . . ?
C8 C9 C10 C15 -74.3(5) . . . . ?
C15 C10 C11 C12 0.8(6) . . . . ?
C9 C10 C11 C12 -179.6(4) . . . . ?
C10 C11 C12 C13 -0.6(7) . . . . ?
C11 C12 C13 C14 0.3(7) . . . . ?
C12 C13 C14 C15 -0.4(7) . . . . ?
C11 C10 C15 C14 -0.9(6) . . . . ?
C9 C10 C15 C14 179.6(4) . . . . ?
C13 C14 C15 C10 0.7(7) . . . . ?
N3 C8 C16 C17 -20.1(5) . . . . ?
C9 C8 C16 C17 98.7(4) . . . . ?
N3 C8 C16 C21 159.5(3) . . . . ?
C9 C8 C16 C21 -81.7(4) . . . . ?
C21 C16 C17 C18 -2.1(6) . . . . ?
C8 C16 C17 C18 177.5(4) . . . . ?
C16 C17 C18 C19 0.5(7) . . . . ?
C17 C18 C19 C20 1.3(7) . . . . ?
C18 C19 C20 C21 -1.4(7) . . . . ?
C17 C16 C21 C20 2.0(6) . . . . ?
C8 C16 C21 C20 -177.7(4) . . . . ?
C19 C20 C21 C16 -0.2(6) . . . . ?
C7 N3 C22 C23 50.8(5) . . . . ?
C8 N3 C22 C23 -97.9(4) . . . . ?
N3 C22 C23 C28 19.1(5) . . . . ?
N3 C22 C23 C24 -162.8(4) . . . . ?
C28 C23 C24 C25 -1.1(6) . . . . ?
C22 C23 C24 C25 -179.3(4) . . . . ?
C23 C24 C25 C26 -0.2(7) . . . . ?
C24 C25 C26 C27 1.7(7) . . . . ?
C25 C26 C27 C28 -1.9(7) . . . . ?
C24 C23 C28 C27 1.0(6) . . . . ?
C22 C23 C28 C27 179.1(4) . . . . ?
C26 C27 C28 C23 0.5(7) . . . . ?
 
_diffrn_measured_fraction_theta_max    0.966
_diffrn_reflns_theta_full              28.62
_diffrn_measured_fraction_theta_full   0.966
_refine_diff_density_max    0.531
_refine_diff_density_min   -0.639
_refine_diff_density_rms    0.084

#===END
 
data_2d
 
_audit_creation_method            SHELXL-97
_chemical_name_systematic
;
 chloro-methyl-(1-trifluoromethylsulfonyl-2-(2-pyridyl)-4,5-diphenyl-
  -imidazoline,N,N')-palladium(II)
;
_chemical_name_common             ?
_chemical_melting_point           ?
_chemical_formula_moiety          ?
_chemical_formula_sum
 'C22 H19 Cl F3 N3 O2 Pd S'
_chemical_formula_weight          588.31
 
loop_
 _atom_type_symbol
 _atom_type_description
 _atom_type_scat_dispersion_real
 _atom_type_scat_dispersion_imag
 _atom_type_scat_source
 'C'  'C'   0.0033   0.0016
 'International Tables Vol C Tables 4.2.6.8 and 6.1.1.4'
 'H'  'H'   0.0000   0.0000
 'International Tables Vol C Tables 4.2.6.8 and 6.1.1.4'
 'N'  'N'   0.0061   0.0033
 'International Tables Vol C Tables 4.2.6.8 and 6.1.1.4'
 'Pd'  'Pd'  -0.9988   1.0072
 'International Tables Vol C Tables 4.2.6.8 and 6.1.1.4'
 'Cl'  'Cl'   0.1484   0.1585
 'International Tables Vol C Tables 4.2.6.8 and 6.1.1.4'
 'S'  'S'   0.1246   0.1234
 'International Tables Vol C Tables 4.2.6.8 and 6.1.1.4'
 'F'  'F'   0.0171   0.0103
 'International Tables Vol C Tables 4.2.6.8 and 6.1.1.4'
 'O'  'O'   0.0106   0.0060
 'International Tables Vol C Tables 4.2.6.8 and 6.1.1.4'
 
_symmetry_cell_setting            'monoclinic'
_symmetry_space_group_name_H-M    'P 21/c'
 
loop_
 _symmetry_equiv_pos_as_xyz
 'x, y, z'
 '-x, y+1/2, -z+1/2'
 '-x, -y, -z'
 'x, -y-1/2, z-1/2'
 
_cell_length_a                    10.698(3)
_cell_length_b                    10.368(4)
_cell_length_c                    21.206(5)
_cell_angle_alpha                 90.00
_cell_angle_beta                  99.84(2)
_cell_angle_gamma                 90.00
_cell_volume                      2317.5(12)
_cell_formula_units_Z             4
_cell_measurement_temperature     293(2)
_cell_measurement_reflns_used     ?
_cell_measurement_theta_min       ?
_cell_measurement_theta_max       ?
 
_exptl_crystal_description        ?
_exptl_crystal_colour             ?
_exptl_crystal_size_max           ?
_exptl_crystal_size_mid           ?
_exptl_crystal_size_min           ?
_exptl_crystal_density_meas       ?
_exptl_crystal_density_diffrn     1.686
_exptl_crystal_density_method     'not measured'
_exptl_crystal_F_000              1176
_exptl_absorpt_coefficient_mu     1.055
_exptl_absorpt_correction_type       refdelf
_exptl_absorpt_correction_T_min      0.3770
_exptl_absorpt_correction_T_max      1.0206
_exptl_absorpt_process_details    
;
Parkin S,Moezzi B & Hope H, (1995) J. Appl. Cryst. 28, 53-56
Cubic fit to sin(theta)/lambda - 24 parameters
;
_exptl_special_details
;
 ?
;
 
_diffrn_ambient_temperature       293(2)
_diffrn_radiation_wavelength      0.71073
_diffrn_radiation_type            mok\a
_diffrn_radiation_source          'fine-focus sealed tube'
_diffrn_radiation_monochromator   graphite
_diffrn_measurement_device_type   'image plate dip1030'
_diffrn_measurement_method        'laser scanner'
_diffrn_detector_area_resol_mean  ?
_diffrn_standards_number          ?
_diffrn_standards_interval_count  ?
_diffrn_standards_interval_time   ?
_diffrn_standards_decay_%         ?
_diffrn_reflns_number             11040
_diffrn_reflns_av_R_equivalents   0.0547
_diffrn_reflns_av_sigmaI/netI     0.0753
_diffrn_reflns_limit_h_min        -14
_diffrn_reflns_limit_h_max        14
_diffrn_reflns_limit_k_min        -14
_diffrn_reflns_limit_k_max        14
_diffrn_reflns_limit_l_min        -28
_diffrn_reflns_limit_l_max        28
_diffrn_reflns_theta_min          2.19
_diffrn_reflns_theta_max          29.06
_reflns_number_total              5719
_reflns_number_gt                 3296
_reflns_threshold_expression      >2sigma(I)
 
_computing_data_collection        'Nonius xpress'
_computing_cell_refinement        'Mosflm (J. Appl. Cryst., 1993, 21, 67)'
_computing_data_reduction         'Mosflm (J. Appl. Cryst., 1993, 21, 67)'
_computing_structure_solution     'Shelxs-97 (Sheldrick, 1990)'
_computing_structure_refinement   'Shelxl-97 (Sheldrick, 1997)'
_computing_molecular_graphics     'Ortep3/windows (Farrugia,1997)'
_computing_publication_material   'Wingx 1.64.03 (Farrugia, 1999)'
 
_refine_special_details
;
 Refinement of F^2^ against ALL reflections.  The weighted R-factor wR and
 goodness of fit S are based on F^2^, conventional R-factors R are based
 on F, with F set to zero for negative F^2^. The threshold expression of
 F^2^ > 2sigma(F^2^) is used only for calculating R-factors(gt) etc. and is
 not relevant to the choice of reflections for refinement.  R-factors based
 on F^2^ are statistically about twice as large as those based on F, and R-
 factors based on ALL data will be even larger.
;
 
_refine_ls_structure_factor_coef  Fsqd
_refine_ls_matrix_type            full
_refine_ls_weighting_scheme       calc
_refine_ls_weighting_details
 'calc w=1/[\s^2^(Fo^2^)+(0.0748P)^2^+0.3901P] where P=(Fo^2^+2Fc^2^)/3'
_atom_sites_solution_primary      direct
_atom_sites_solution_secondary    difmap
_atom_sites_solution_hydrogens    geom
_refine_ls_hydrogen_treatment     mixed
_refine_ls_extinction_method      none
_refine_ls_extinction_coef        ?
_refine_ls_number_reflns          5719
_refine_ls_number_parameters      299
_refine_ls_number_restraints      0
_refine_ls_R_factor_all           0.0798
_refine_ls_R_factor_gt            0.0509
_refine_ls_wR_factor_ref          0.1501
_refine_ls_wR_factor_gt           0.1319
_refine_ls_goodness_of_fit_ref    1.032
_refine_ls_restrained_S_all       1.032
_refine_ls_shift/su_max           0.001
_refine_ls_shift/su_mean          0.000
 
loop_
 _atom_site_label
 _atom_site_type_symbol
 _atom_site_fract_x
 _atom_site_fract_y
 _atom_site_fract_z
 _atom_site_U_iso_or_equiv
 _atom_site_adp_type
 _atom_site_occupancy
 _atom_site_symmetry_multiplicity
 _atom_site_calc_flag
 _atom_site_refinement_flags
 _atom_site_disorder_assembly
 _atom_site_disorder_group
Pd Pd 0.05371(4) 0.51716(4) 0.080755(19) 0.05433(17) Uani 1 1 d . . .
Cl1 Cl 0.26271(16) 0.50437(18) 0.07131(9) 0.0805(5) Uani 1 1 d . . .
S S -0.40241(12) 0.74278(13) 0.01893(6) 0.0518(3) Uani 1 1 d . . .
F1 F -0.5390(3) 0.7842(4) 0.10826(17) 0.0773(10) Uani 1 1 d . . .
F2 F -0.5878(4) 0.8998(4) 0.0246(2) 0.0852(11) Uani 1 1 d . . .
F3 F -0.4204(4) 0.9439(4) 0.0925(2) 0.0882(12) Uani 1 1 d . . .
O1 O -0.3329(3) 0.8243(3) -0.01607(17) 0.0599(9) Uani 1 1 d . . .
O2 O -0.4960(3) 0.6558(4) -0.01107(17) 0.0626(10) Uani 1 1 d . . .
N1 N 0.0376(4) 0.7237(5) 0.0768(2) 0.0577(11) Uani 1 1 d . . .
N2 N -0.1328(4) 0.5468(4) 0.0907(2) 0.0504(10) Uani 1 1 d . . .
N3 N -0.3054(4) 0.6757(4) 0.07746(19) 0.0485(9) Uani 1 1 d . . .
C2 C 0.1304(6) 0.8092(6) 0.0796(3) 0.0695(16) Uani 1 1 d . . .
H2 H 0.2125 0.7797 0.0796 0.083 Uiso 1 1 calc R . .
C3 C 0.1101(7) 0.9402(7) 0.0825(4) 0.084(2) Uani 1 1 d . . .
H3 H 0.1766 0.9982 0.0833 0.100 Uiso 1 1 calc R . .
C4 C -0.0115(8) 0.9834(6) 0.0841(4) 0.083(2) Uani 1 1 d . . .
H4 H -0.0276 1.0710 0.0877 0.099 Uiso 1 1 calc R . .
C5 C -0.1072(6) 0.8963(5) 0.0806(3) 0.0646(15) Uani 1 1 d . . .
H5 H -0.1897 0.9240 0.0810 0.077 Uiso 1 1 calc R . .
C6 C -0.0817(5) 0.7674(5) 0.0764(2) 0.0510(11) Uani 1 1 d . . .
C7 C -0.1727(4) 0.6618(5) 0.0785(2) 0.0467(11) Uani 1 1 d . . .
C8 C -0.3462(5) 0.5559(5) 0.1084(2) 0.0549(12) Uani 1 1 d . . .
H8 H -0.4279 0.5261 0.0847 0.066 Uiso 1 1 calc R . .
C9 C -0.2387(5) 0.4590(5) 0.0979(2) 0.0531(12) Uani 1 1 d . . .
H9 H -0.2655 0.4137 0.0573 0.064 Uiso 1 1 calc R . .
C10 C -0.2052(5) 0.3602(5) 0.1504(2) 0.0543(12) Uani 1 1 d . . .
C11 C -0.2617(6) 0.2423(6) 0.1454(3) 0.0691(15) Uani 1 1 d . . .
H11 H -0.3187 0.2219 0.1086 0.083 Uiso 1 1 calc R . .
C12 C -0.2363(7) 0.1524(7) 0.1938(4) 0.087(2) Uani 1 1 d . . .
H12 H -0.2770 0.0728 0.1898 0.104 Uiso 1 1 calc R . .
C13 C -0.1508(7) 0.1811(8) 0.2478(3) 0.092(2) Uani 1 1 d . . .
H13 H -0.1320 0.1202 0.2803 0.111 Uiso 1 1 calc R . .
C14 C -0.0930(7) 0.2996(7) 0.2540(3) 0.0795(18) Uani 1 1 d . . .
H14 H -0.0357 0.3192 0.2909 0.095 Uiso 1 1 calc R . .
C15 C -0.1192(6) 0.3891(6) 0.2061(3) 0.0693(15) Uani 1 1 d . . .
H15 H -0.0797 0.4693 0.2105 0.083 Uiso 1 1 calc R . .
C16 C -0.3583(5) 0.5821(6) 0.1775(3) 0.0630(14) Uani 1 1 d . . .
C17 C -0.2929(7) 0.6776(8) 0.2135(3) 0.085(2) Uani 1 1 d . . .
H17 H -0.2381 0.7304 0.1956 0.102 Uiso 1 1 calc R . .
C18 C -0.3079(9) 0.6967(11) 0.2773(4) 0.116(3) Uani 1 1 d . . .
H18 H -0.2634 0.7620 0.3015 0.139 Uiso 1 1 calc R . .
C19 C -0.3882(12) 0.6186(13) 0.3036(4) 0.128(4) Uani 1 1 d . . .
H19 H -0.3991 0.6304 0.3458 0.153 Uiso 1 1 calc R . .
C20 C -0.4503(11) 0.5259(12) 0.2682(5) 0.131(4) Uani 1 1 d . . .
H20 H -0.5040 0.4729 0.2869 0.157 Uiso 1 1 calc R . .
C21 C -0.4396(7) 0.5036(7) 0.2046(4) 0.091(2) Uani 1 1 d . . .
H21 H -0.4855 0.4382 0.1811 0.109 Uiso 1 1 calc R . .
C22 C -0.4925(6) 0.8500(6) 0.0645(3) 0.0632(14) Uani 1 1 d . . .
C1 C 0.0547(5) 0.3175(4) 0.0841(2) 0.0497(11) Uani 1 1 d . . .
H1A H 0.0518 0.2896 0.1270 0.075 Uiso 1 1 calc R . .
H1B H 0.1307 0.2857 0.0712 0.075 Uiso 1 1 calc R . .
H1C H -0.0179 0.2847 0.0558 0.075 Uiso 1 1 calc R . .
 
loop_
 _atom_site_aniso_label
 _atom_site_aniso_U_11
 _atom_site_aniso_U_22
 _atom_site_aniso_U_33
 _atom_site_aniso_U_23
 _atom_site_aniso_U_13
 _atom_site_aniso_U_12
Pd 0.0541(3) 0.0555(3) 0.0533(2) -0.00088(18) 0.00889(17) 0.00303(19)
Cl1 0.0593(9) 0.1010(13) 0.0821(11) -0.0027(9) 0.0146(7) 0.0074(8)
S 0.0509(7) 0.0498(7) 0.0532(7) 0.0012(5) 0.0051(5) 0.0025(6)
F1 0.072(2) 0.083(2) 0.082(2) 0.0020(19) 0.0280(18) 0.0051(19)
F2 0.076(2) 0.077(2) 0.102(3) 0.010(2) 0.016(2) 0.023(2)
F3 0.082(2) 0.075(2) 0.111(3) -0.035(2) 0.028(2) -0.011(2)
O1 0.066(2) 0.054(2) 0.061(2) 0.0117(17) 0.0145(17) 0.0037(18)
O2 0.059(2) 0.059(2) 0.063(2) -0.0036(17) -0.0066(17) -0.0016(18)
N1 0.054(3) 0.056(3) 0.065(3) 0.002(2) 0.013(2) -0.006(2)
N2 0.056(2) 0.043(2) 0.052(2) 0.0011(17) 0.0094(18) -0.0034(19)
N3 0.046(2) 0.045(2) 0.055(2) 0.0018(18) 0.0090(17) -0.0035(19)
C2 0.054(3) 0.076(4) 0.077(4) 0.004(3) 0.009(3) -0.016(3)
C3 0.076(4) 0.075(5) 0.095(5) 0.011(4) 0.001(4) -0.028(4)
C4 0.094(5) 0.048(3) 0.105(6) 0.000(3) 0.012(4) -0.009(3)
C5 0.063(3) 0.047(3) 0.083(4) 0.006(3) 0.009(3) -0.008(3)
C6 0.056(3) 0.040(3) 0.056(3) 0.004(2) 0.008(2) -0.008(2)
C7 0.045(3) 0.048(3) 0.047(3) -0.006(2) 0.0059(19) -0.002(2)
C8 0.055(3) 0.055(3) 0.054(3) 0.009(2) 0.006(2) -0.005(3)
C9 0.054(3) 0.052(3) 0.051(3) 0.003(2) 0.000(2) -0.010(2)
C10 0.052(3) 0.057(3) 0.052(3) 0.004(2) 0.002(2) 0.000(2)
C11 0.079(4) 0.056(3) 0.069(4) 0.007(3) 0.002(3) -0.011(3)
C12 0.097(5) 0.069(4) 0.092(5) 0.026(4) 0.012(4) -0.009(4)
C13 0.107(6) 0.097(6) 0.069(4) 0.034(4) 0.002(4) 0.010(4)
C14 0.085(5) 0.087(5) 0.064(4) 0.017(3) 0.004(3) 0.006(4)
C15 0.068(4) 0.066(4) 0.072(4) 0.005(3) 0.007(3) -0.013(3)
C16 0.053(3) 0.076(4) 0.060(3) 0.010(3) 0.011(2) 0.001(3)
C17 0.079(4) 0.107(6) 0.070(4) -0.009(4) 0.016(3) 0.000(4)
C18 0.111(6) 0.167(9) 0.064(5) -0.023(5) 0.003(4) 0.030(6)
C19 0.144(9) 0.186(12) 0.060(5) 0.010(6) 0.035(6) 0.053(8)
C20 0.130(9) 0.179(11) 0.100(7) 0.044(7) 0.066(7) 0.034(8)
C21 0.085(5) 0.103(6) 0.091(5) 0.024(4) 0.036(4) 0.008(4)
C22 0.061(3) 0.056(3) 0.073(4) 0.000(3) 0.011(3) 0.000(3)
C1 0.069(3) 0.030(2) 0.049(3) 0.0019(19) 0.007(2) 0.000(2)
 
_geom_special_details
;
 All esds (except the esd in the dihedral angle between two l.s. planes)
 are estimated using the full covariance matrix.  The cell esds are taken
 into account individually in the estimation of esds in distances, angles
 and torsion angles; correlations between esds in cell parameters are only
 used when they are defined by crystal symmetry.  An approximate (isotropic)
 treatment of cell esds is used for estimating esds involving l.s. planes.
;
 
loop_
 _geom_bond_atom_site_label_1
 _geom_bond_atom_site_label_2
 _geom_bond_distance
 _geom_bond_site_symmetry_2
 _geom_bond_publ_flag
Pd N2 2.065(4) . ?
Pd C1 2.071(4) . ?
Pd N1 2.149(5) . ?
Pd Cl1 2.2824(18) . ?
S O2 1.415(4) . ?
S O1 1.416(4) . ?
S N3 1.631(4) . ?
S C22 1.848(6) . ?
F1 C22 1.317(7) . ?
F2 C22 1.314(7) . ?
F3 C22 1.318(7) . ?
N1 C2 1.325(7) . ?
N1 C6 1.352(7) . ?
N2 C7 1.279(6) . ?
N2 C9 1.480(7) . ?
N3 C7 1.423(6) . ?
N3 C8 1.503(6) . ?
C2 C3 1.379(10) . ?
C3 C4 1.382(11) . ?
C4 C5 1.357(9) . ?
C5 C6 1.370(7) . ?
C6 C7 1.471(7) . ?
C8 C16 1.519(8) . ?
C8 C9 1.571(8) . ?
C9 C10 1.510(7) . ?
C10 C11 1.359(8) . ?
C10 C15 1.400(8) . ?
C11 C12 1.379(8) . ?
C12 C13 1.371(10) . ?
C13 C14 1.372(10) . ?
C14 C15 1.370(8) . ?
C16 C17 1.367(9) . ?
C16 C21 1.386(9) . ?
C17 C18 1.403(10) . ?
C18 C19 1.366(14) . ?
C19 C20 1.327(15) . ?
C20 C21 1.392(12) . ?
 
loop_
 _geom_angle_atom_site_label_1
 _geom_angle_atom_site_label_2
 _geom_angle_atom_site_label_3
 _geom_angle
 _geom_angle_site_symmetry_1
 _geom_angle_site_symmetry_3
 _geom_angle_publ_flag
N2 Pd C1 98.30(19) . . ?
N2 Pd N1 77.48(16) . . ?
C1 Pd N1 175.72(18) . . ?
N2 Pd Cl1 174.71(13) . . ?
C1 Pd Cl1 86.88(15) . . ?
N1 Pd Cl1 97.35(12) . . ?
O2 S O1 122.6(2) . . ?
O2 S N3 112.3(2) . . ?
O1 S N3 109.3(2) . . ?
O2 S C22 103.1(3) . . ?
O1 S C22 106.4(3) . . ?
N3 S C22 100.3(3) . . ?
C2 N1 C6 118.4(5) . . ?
C2 N1 Pd 127.6(4) . . ?
C6 N1 Pd 113.8(3) . . ?
C7 N2 C9 111.0(4) . . ?
C7 N2 Pd 114.4(3) . . ?
C9 N2 Pd 133.5(3) . . ?
C7 N3 C8 105.9(4) . . ?
C7 N3 S 123.9(3) . . ?
C8 N3 S 119.3(3) . . ?
N1 C2 C3 122.5(6) . . ?
C2 C3 C4 118.5(6) . . ?
C5 C4 C3 119.1(6) . . ?
C4 C5 C6 119.7(6) . . ?
N1 C6 C5 121.6(5) . . ?
N1 C6 C7 112.3(4) . . ?
C5 C6 C7 125.7(5) . . ?
N2 C7 N3 113.3(4) . . ?
N2 C7 C6 120.0(4) . . ?
N3 C7 C6 126.1(4) . . ?
N3 C8 C16 110.6(4) . . ?
N3 C8 C9 101.1(4) . . ?
C16 C8 C9 115.8(4) . . ?
N2 C9 C10 113.8(4) . . ?
N2 C9 C8 102.3(4) . . ?
C10 C9 C8 114.6(4) . . ?
C11 C10 C15 118.5(5) . . ?
C11 C10 C9 120.4(5) . . ?
C15 C10 C9 121.0(5) . . ?
C10 C11 C12 121.5(6) . . ?
C13 C12 C11 119.5(7) . . ?
C12 C13 C14 120.0(6) . . ?
C15 C14 C13 120.3(6) . . ?
C14 C15 C10 120.2(6) . . ?
C17 C16 C21 119.4(6) . . ?
C17 C16 C8 123.3(5) . . ?
C21 C16 C8 117.2(6) . . ?
C16 C17 C18 120.6(8) . . ?
C19 C18 C17 119.5(9) . . ?
C20 C19 C18 119.2(9) . . ?
C19 C20 C21 123.5(10) . . ?
C16 C21 C20 117.7(9) . . ?
F2 C22 F1 108.2(5) . . ?
F2 C22 F3 109.2(5) . . ?
F1 C22 F3 109.1(5) . . ?
F2 C22 S 108.5(4) . . ?
F1 C22 S 110.5(4) . . ?
F3 C22 S 111.3(4) . . ?
 
loop_
 _geom_torsion_atom_site_label_1
 _geom_torsion_atom_site_label_2
 _geom_torsion_atom_site_label_3
 _geom_torsion_atom_site_label_4
 _geom_torsion
 _geom_torsion_site_symmetry_1
 _geom_torsion_site_symmetry_2
 _geom_torsion_site_symmetry_3
 _geom_torsion_site_symmetry_4
 _geom_torsion_publ_flag
N2 Pd N1 C2 168.7(5) . . . . ?
C1 Pd N1 C2 178(100) . . . . ?
Cl1 Pd N1 C2 -10.1(5) . . . . ?
N2 Pd N1 C6 -5.9(3) . . . . ?
C1 Pd N1 C6 4(3) . . . . ?
Cl1 Pd N1 C6 175.2(3) . . . . ?
C1 Pd N2 C7 -167.3(4) . . . . ?
N1 Pd N2 C7 12.0(3) . . . . ?
Cl1 Pd N2 C7 24.3(15) . . . . ?
C1 Pd N2 C9 -0.3(5) . . . . ?
N1 Pd N2 C9 179.0(5) . . . . ?
Cl1 Pd N2 C9 -168.7(11) . . . . ?
O2 S N3 C7 117.8(4) . . . . ?
O1 S N3 C7 -21.8(5) . . . . ?
C22 S N3 C7 -133.3(4) . . . . ?
O2 S N3 C8 -21.2(4) . . . . ?
O1 S N3 C8 -160.8(4) . . . . ?
C22 S N3 C8 87.7(4) . . . . ?
C6 N1 C2 C3 0.5(9) . . . . ?
Pd N1 C2 C3 -173.9(5) . . . . ?
N1 C2 C3 C4 1.6(11) . . . . ?
C2 C3 C4 C5 -2.3(12) . . . . ?
C3 C4 C5 C6 0.9(11) . . . . ?
C2 N1 C6 C5 -2.0(8) . . . . ?
Pd N1 C6 C5 173.2(4) . . . . ?
C2 N1 C6 C7 -175.4(5) . . . . ?
Pd N1 C6 C7 -0.2(5) . . . . ?
C4 C5 C6 N1 1.3(9) . . . . ?
C4 C5 C6 C7 173.7(6) . . . . ?
C9 N2 C7 N3 2.3(6) . . . . ?
Pd N2 C7 N3 172.2(3) . . . . ?
C9 N2 C7 C6 173.4(4) . . . . ?
Pd N2 C7 C6 -16.7(6) . . . . ?
C8 N3 C7 N2 14.5(5) . . . . ?
S N3 C7 N2 -129.0(4) . . . . ?
C8 N3 C7 C6 -155.9(5) . . . . ?
S N3 C7 C6 60.6(6) . . . . ?
N1 C6 C7 N2 11.2(7) . . . . ?
C5 C6 C7 N2 -161.8(5) . . . . ?
N1 C6 C7 N3 -178.9(4) . . . . ?
C5 C6 C7 N3 8.1(8) . . . . ?
C7 N3 C8 C16 100.0(5) . . . . ?
S N3 C8 C16 -114.5(4) . . . . ?
C7 N3 C8 C9 -23.2(5) . . . . ?
S N3 C8 C9 122.3(4) . . . . ?
C7 N2 C9 C10 -141.4(5) . . . . ?
Pd N2 C9 C10 51.3(6) . . . . ?
C7 N2 C9 C8 -17.1(5) . . . . ?
Pd N2 C9 C8 175.5(3) . . . . ?
N3 C8 C9 N2 23.8(5) . . . . ?
C16 C8 C9 N2 -95.8(5) . . . . ?
N3 C8 C9 C10 147.4(4) . . . . ?
C16 C8 C9 C10 27.9(7) . . . . ?
N2 C9 C10 C11 -149.2(5) . . . . ?
C8 C9 C10 C11 93.5(6) . . . . ?
N2 C9 C10 C15 33.1(8) . . . . ?
C8 C9 C10 C15 -84.2(7) . . . . ?
C15 C10 C11 C12 0.3(10) . . . . ?
C9 C10 C11 C12 -177.4(6) . . . . ?
C10 C11 C12 C13 -1.1(11) . . . . ?
C11 C12 C13 C14 1.3(12) . . . . ?
C12 C13 C14 C15 -0.7(12) . . . . ?
C13 C14 C15 C10 -0.1(11) . . . . ?
C11 C10 C15 C14 0.3(9) . . . . ?
C9 C10 C15 C14 178.0(6) . . . . ?
N3 C8 C16 C17 -25.3(8) . . . . ?
C9 C8 C16 C17 88.9(7) . . . . ?
N3 C8 C16 C21 155.0(5) . . . . ?
C9 C8 C16 C21 -90.7(7) . . . . ?
C21 C16 C17 C18 -0.1(10) . . . . ?
C8 C16 C17 C18 -179.8(6) . . . . ?
C16 C17 C18 C19 0.2(13) . . . . ?
C17 C18 C19 C20 0.2(15) . . . . ?
C18 C19 C20 C21 -0.7(17) . . . . ?
C17 C16 C21 C20 -0.3(11) . . . . ?
C8 C16 C21 C20 179.3(7) . . . . ?
C19 C20 C21 C16 0.8(15) . . . . ?
O2 S C22 F2 -55.6(4) . . . . ?
O1 S C22 F2 74.6(4) . . . . ?
N3 S C22 F2 -171.6(4) . . . . ?
O2 S C22 F1 62.9(5) . . . . ?
O1 S C22 F1 -167.0(4) . . . . ?
N3 S C22 F1 -53.1(4) . . . . ?
O2 S C22 F3 -175.8(4) . . . . ?
O1 S C22 F3 -45.6(5) . . . . ?
N3 S C22 F3 68.2(5) . . . . ?
 
_diffrn_measured_fraction_theta_max    0.922
_diffrn_reflns_theta_full              29.06
_diffrn_measured_fraction_theta_full   0.922
_refine_diff_density_max    0.713
_refine_diff_density_min   -0.803
_refine_diff_density_rms    0.094

#===END
